# Supplementary material for: Psychometric Properties of the Spontaneous and Deliberate Mind Wandering Scales
Source: Atypon-hosted journal article supplement (doi:10.1027/1015-5759/a000470), 2018-06-15
Supplement: 1015-5759_a000470_esm1.pdf [file 1015-5759_a000470_esm1.pdf]

## Mind Wandering Spontaneous and Deliberate: Validation of a questionnaire (#398)

### Author(s)

David Marcusson-Clavertz (Lund University) - david.marcusson-clavertz@psy.lu.se  
Oscar Kjell (Lund University) - oscar.kjell@psy.lu.se

Created: 01/14/2016

Made public: 01/15/2016

### 1) What's the main question being asked or hypothesis being tested in this study?

RQ 1. What is the internal factor structure and test-retest reliability of the Spontaneous and Deliberate Mind Wandering Questionnaire (SDMWQ; see DOI: 10.1037/a0031438)? We expect that a 2-component solution provides the best fit.

RQ 2. Are Spontaneous or Deliberate MW related to Social Desirability? We expect that spontaneous MW is negatively related to social desirability

RQ 3. What are the relations between the SDMWQ and the Short Imaginal Processes Inventory (SIPI) scales? Due to item overlap we expect that Spontaneous mind wandering will correlate strongly with the Poor attentional control style, whereas Deliberate mind wandering will correlate strongly with the Positive-constructive daydreaming style. Due to the negative content of the Guilt/fear-of-failure daydreaming style, we expect that it will correlate with spontaneous mind wandering.

### 2) Describe the key dependent variable(s) specifying how they will be measured.

SDMWQ (8 items): Spontaneous and Deliberate MW.

SIPI (45 items): Positive-constructive, Guilt/Fear-of-failure, Poor attentional Control style

Social Desirability Scale (SDS-17; 16 items, excluding #4): Social desirability.

### 3) How many and which conditions will participants be assigned to?

Not applicable.

### 4) Specify exactly which analyses you will conduct to examine the main question/hypothesis.

1.a. Confirmatory factor analysis on the SDMWQ.

1.b. Pearson correlations to evaluate test-retest reliability.

2. Pearson correlations to evaluate the relations between social desirability and spontaneous/deliberate MW scales.

3. Pearson correlations to evaluate the relations between the three SIPI scales and the two MW Spontaneous/Deliberate. scales.

All correlation tests will be two-tailed, alpha set at .05.

### 5) Any secondary analyses?

Pearson correlation SIPI test-retest reliability (for comparisons with the SDMWQ).

Pearson correlations on SIPI scales with social desirability.

### 6) How many observations will be collected or what will determine sample size? No need to justify decision, but be precise about exactly how the number will be determined.

N = 300

### 7) Anything else you would like to pre-register? (e.g., data exclusions, variables collected for exploratory purposes, any unusual analyses planned?)

\* We will exclude any participant that gives an incorrect answer to any of two control items (e.g., "on this question answer alternative number three").

\*At the end of the study we will ask participants to describe their typical spontaneous and deliberate mind wandering in 5 keywords respectively. This will be done in an exploratory purpose (as a pilot for further testing) to examine the semantic meanings of deliberate and spontaneous mind wandering.

### 8) Have any data been collected for this study already?

No, no data have been collected for this study yet
