# Supplementary material for: Psychometric Properties of the Spontaneous and Deliberate Mind Wandering Scales
Source: Atypon-hosted journal article supplement (doi:10.1027/1015-5759/a000470), 2018-06-15
Supplement: 1015-5759_a000470_esm2.pdf [file 1015-5759_a000470_esm2.pdf]

## Mind Wandering Spontaneous and Deliberate: Predictive validity (#510)

### Author(s)

Oscar Kjell (Lund University) - oscar.kjell@psy.lu.se

David Marcusson-Clavertz (Lund University) - david.marcusson-clavertz@psy.lu.se

Created: 03/07/2016

Made public: 03/07/2016

### 1) What's the main question being asked or hypothesis being tested in this study?

This study evaluates the predictive validity of the Spontaneous and Deliberate MW Questionnaire (SDMWQ; see <http://dx.doi.org/10.1037/a0031438>).

RQ 1: Do Spontaneous and Deliberate mind wandering (MW) predict experience sampling probe reports of intentional and unintentional MW? We expect to conceptually replicate a previous study (<http://dx.doi.org/10.1016/j.concog.2016.02.002>). We expect that Spontaneous MW will uniquely predict probe reports of unintentional MW, whereas Deliberate MW will uniquely predict probe reports of intentional MW.

RQ 2: What is the relation between social desirability and questionnaire/experience-sampling reports of MW? Based on a preliminary finding (manuscript in preparation) we expect that social desirability will be negatively associated with questionnaire reports of spontaneous MW. But given that experience sampling has been proposed to be less susceptible for social desirability, we do not expect a relation between experience sampling reports and social desirability.

RQ 3: What are the relations between Spontaneous and Deliberate MW and Openness to experience? We expect that Deliberate MW uniquely predicts Openness to experience with the Spontaneous MW scale adjusted for.

RQ 4: What are the relations between Spontaneous and Deliberate MW and Generalized anxiety disorder? We expect that Spontaneous MW uniquely predicts Generalized anxiety disorder with Deliberate MW adjusted for.

### 2) Describe the key dependent variable(s) specifying how they will be measured.

Spontaneous and Deliberate MW: SDMWQ (8 items).

Social desirability: Social Desirability Scale (SDS-17; 16 items, excluding #4).

ON-task, Unintentional MW, and Intentional MW: Choice Discrimination Task with probes.

Generalized anxiety disorder: The Generalized Anxiety Disorder Scale (GAD; 7 items).

Openness to experience: Big Five Inventory - Openness (10 items).

### 3) How many and which conditions will participants be assigned to?

Not applicable.

### 4) Specify exactly which analyses you will conduct to examine the main question/hypothesis.

RQ 1. An HLM analysis with Spontaneous and Deliberate MW as predictors and Unintentional and Intentional MW as two outcome variables (multinomial with ON-task as baseline category).

RQ 2. Pearson correlations to evaluate the associations between Social Desirability and Spontaneous and Deliberate MW. To simplify comparisons we will also compute Pearson correlations between Social Desirability and probe reports of Unintentional and Intentional MW (by aggregating the number of probe reports, see <http://dx.doi.org/10.1016/j.concog.2016.02.002>).

RQ 3. A multiple regression with Spontaneous and Deliberate MW as predictors and Openness as the outcome variable.

RQ 4. A multiple regression with Spontaneous and Deliberate MW as predictors and Generalized anxiety disorder as the outcome variable.

Alpha = .05, two-tailed.

### 5) Any secondary analyses?

In the analysis pertaining to RQ1 We will also evaluate if including social desirability in the model will adjust the relations between the questionnaire and probe responses of unintentional and intentional MW.

### 6) How many observations will be collected or what will determine sample size? No need to justify decision, but be precise about exactly how the number will be determined.

N = 350

### 7) Anything else you would like to pre-register? (e.g., data exclusions, variables collected for exploratory purposes, unusual analyses planned?)

Exclusion: Any participant that gives an incorrect answer to any of the control items (e.g., "on this question answer 3"), not counting errors in practice blocks. Exploratory: Participants will describe the content of their thoughts in one word at each probe. This will be done as a pilot for further testing and not be reported here.

### 8) Have any data been collected for this study already?

No, no data have been collected for this study yet
